# Supplementary material
Source: PubMed Central journal article supplement (PMC6899211)
Supplement: NIHMS1542938-supplement-1.pdf [file NIHMS1542938-supplement-1.pdf]

Supplementary Materials for:

**NEONATAL ETHANOL EXPOSURE TRIGGERS APOPTOSIS IN THE MURINE  
RETROSPLENIAL CORTEX: ROLE OF INHIBITION OF NMDA RECEPTOR-DRIVEN  
ACTION POTENTIAL FIRING**

Clark W. Bird, Megan J. Barber, Hillary R. Post, Belkis Jacquez, Glenna J. Chavez,  
Nicholas G. Faturos, and C. Fernando Valenzuela

Department of Neurosciences, School of Medicine,  
University of New Mexico Health Sciences Center  
Albuquerque, New Mexico, U.S.A.

**This PDF file includes:**

Supplementary Table 1

Supplementary Figures 1 to 5

**Supplemental Table 1. Comprehensive collection of all statistical analyses performed.**

| Figure or results section | Experiment                                                           | Test                                                                           | Measure                                  | df         | Test statistic | p value | Effect size measure | Effect size | Notes                       | Passes SW normality test?         |                     |
|---------------------------|----------------------------------------------------------------------|--------------------------------------------------------------------------------|------------------------------------------|------------|----------------|---------|---------------------|-------------|-----------------------------|-----------------------------------|---------------------|
| Figure 2                  | Blood ethanol concentrations during and after vapor chamber exposure | One-way ANOVA                                                                  | Effect of vapor chamber exposure on BECs | F(5,18)    | 40.029         | <0.0001 | Partial eta squared | 0.917       |                             |                                   |                     |
|                           |                                                                      |                                                                                | 0 h vs 2 h                               | t(18)      | 3.148          | 0.0278  | Hedges' g           | 6.286       | Bonferroni adjusted p-value |                                   |                     |
|                           |                                                                      | Multiple comparison: comparing all time points to 0 h (no-exposure) time point | 0 h vs 4 h                               | t(18)      | 9.202          | <0.0001 | Hedges' g           | 5.152       | Bonferroni adjusted p-value |                                   | Yes: residuals pass |
|                           |                                                                      |                                                                                | 0 h vs 8 h                               | t(18)      | 10.140         | <0.0001 | Hedges' g           | 6.066       | Bonferroni adjusted p-value |                                   |                     |
|                           |                                                                      |                                                                                | 0 h vs 12 h                              | t(18)      | 7.019          | <0.0001 | Hedges' g           | 5.494       | Bonferroni adjusted p-value |                                   |                     |
|                           |                                                                      |                                                                                | 0 h vs 24 h                              | t(18)      | 0.154          | >0.9999 | Hedges' g           | 0.615       | Bonferroni adjusted p-value |                                   |                     |
| Figure 3I                 | Caspase cell counts                                                  | Adjusted rank transform                                                        | Interaction (Layer X Time Point)         | F(8,63)    | 5.185          | <0.0001 | Partial eta squared | 0.397       |                             | No: residuals fail normality test |                     |
|                           |                                                                      |                                                                                | Scheirer-Ray-Hare Test                   | Layer      | H(2)           | 21.760  | <0.0001             | Eta squared | 0.123                       |                                   |                     |
|                           |                                                                      | Dunn's multiple comparison: comparing time points within layer                 | Time Point                               | H(4)       | 33.393         | <0.0001 | Eta squared         | 0.308       |                             |                                   |                     |
|                           |                                                                      |                                                                                | Layer 1 Control vs. 0 h                  | n/a        | 0.165          | >0.9999 | r                   | 0.052       | Bonferroni adjusted p-value |                                   |                     |
|                           |                                                                      |                                                                                | Layer 1 Control vs. 2 h                  | n/a        | 1.034          | >0.9999 | r                   | 0.327       | Bonferroni adjusted p-value |                                   |                     |
|                           |                                                                      |                                                                                | Layer 1 Control vs. 4 h                  | n/a        | 1.530          | 0.5043  | r                   | 0.484       | Bonferroni adjusted p-value |                                   |                     |
|                           |                                                                      |                                                                                | Layer 1 Control vs. 8 h                  | n/a        | 1.835          | 0.2658  | r                   | 0.553       | Bonferroni adjusted p-value |                                   |                     |
|                           |                                                                      |                                                                                | Layers 2-4 Control vs. 0 h               | n/a        | 0.620          | >0.9999 | r                   | 0.196       | Bonferroni adjusted p-value |                                   |                     |
|                           |                                                                      |                                                                                | Layers 2-4 Control vs. 2 h               | n/a        | 2.233          | 0.1023  | r                   | 0.706       | Bonferroni adjusted p-value |                                   |                     |
|                           |                                                                      |                                                                                | Layers 2-4 Control vs. 4 h               | n/a        | 3.266          | 0.0044  | r                   | 1.033       | Bonferroni adjusted p-value |                                   |                     |
|                           |                                                                      |                                                                                | Layers 2-4 Control vs. 8 h               | n/a        | 3.563          | 0.0015  | r                   | 1.074       | Bonferroni adjusted p-value |                                   |                     |
|                           |                                                                      |                                                                                | Layer 5 Control vs. 0 h                  | n/a        | 1.240          | 0.8594  | r                   | 0.392       | Bonferroni adjusted p-value |                                   |                     |
|                           |                                                                      |                                                                                | Layer 5 Control vs. 2 h                  | n/a        | 2.439          | 0.0589  | r                   | 0.771       | Bonferroni adjusted p-value |                                   |                     |
|                           |                                                                      |                                                                                | Layer 5 Control vs. 4 h                  | n/a        | 2.729          | 0.0254  | r                   | 0.863       | Bonferroni adjusted p-value |                                   |                     |
|                           |                                                                      |                                                                                | Layer 5 Control vs. 8 h                  | n/a        | 4.246          | <0.0001 | r                   | 1.280       | Bonferroni adjusted p-value |                                   |                     |
| Figure 3J                 | Caspase interneuron counts                                           | Adjusted rank transform                                                        | Interaction (Layer X Time Point)         | F(8,63)    | 3.880          | 0.0009  | Partial eta squared | 0.330       |                             | No: residuals fail normality test |                     |
|                           |                                                                      |                                                                                | Scheirer-Ray-Hare Test                   | Layer      | H(2)           | 29.093  | <0.0001             | Eta squared | 0.240                       |                                   |                     |
|                           |                                                                      | Dunn's multiple comparison: comparing time points within layer                 | Time Point                               | H(4)       | 21.704         | 0.0002  | Eta squared         | 0.122       |                             |                                   |                     |
|                           |                                                                      |                                                                                | Layer 1 Control vs. 0 h                  | n/a        | 1.298          | 0.7769  | r                   | 0.410       | Bonferroni adjusted p-value |                                   |                     |
|                           |                                                                      |                                                                                | Layer 1 Control vs. 2 h                  | n/a        | 0.085          | >0.9999 | r                   | 0.027       | Bonferroni adjusted p-value |                                   |                     |
|                           |                                                                      |                                                                                | Layer 1 Control vs. 4 h                  | n/a        | 0.830          | >0.9999 | r                   | 0.262       | Bonferroni adjusted p-value |                                   |                     |
|                           |                                                                      |                                                                                | Layer 1 Control vs. 8 h                  | n/a        | 2.312          | 0.0832  | r                   | 0.697       | Bonferroni adjusted p-value |                                   |                     |
|                           |                                                                      |                                                                                | Layers 2-4 Control vs. 0 h               | n/a        | 1.447          | 0.5915  | r                   | 0.458       | Bonferroni adjusted p-value |                                   |                     |
|                           |                                                                      |                                                                                | Layers 2-4 Control vs. 2 h               | n/a        | 2.357          | 0.0738  | r                   | 0.745       | Bonferroni adjusted p-value |                                   |                     |
|                           |                                                                      |                                                                                | Layers 2-4 Control vs. 4 h               | n/a        | 3.101          | 0.0077  | r                   | 0.981       | Bonferroni adjusted p-value |                                   |                     |
|                           |                                                                      |                                                                                | Layers 2-4 Control vs. 8 h               | n/a        | 2.879          | 0.0160  | r                   | 0.868       | Bonferroni adjusted p-value |                                   |                     |
|                           |                                                                      |                                                                                | Layer 5 Control vs. 0 h                  | n/a        | 1.488          | 0.5466  | r                   | 0.471       | Bonferroni adjusted p-value |                                   |                     |
|                           |                                                                      |                                                                                | Layer 5 Control vs. 2 h                  | n/a        | 3.018          | 0.0102  | r                   | 0.954       | Bonferroni adjusted p-value |                                   |                     |
|                           |                                                                      |                                                                                | Layer 5 Control vs. 4 h                  | n/a        | 2.729          | 0.0254  | r                   | 0.863       | Bonferroni adjusted p-value |                                   |                     |
|                           |                                                                      |                                                                                | Layer 5 Control vs. 8 h                  | n/a        | 3.527          | 0.0017  | r                   | 1.063       | Bonferroni adjusted p-value |                                   |                     |
| Figure 4I                 | TUNEL cell counts                                                    | Adjusted rank transform                                                        | Interaction (Layer X Time Point)         | F(2,30)    | 16.215         | <0.0001 | Partial eta squared | 0.519       |                             | No: residuals fail normality test |                     |
|                           |                                                                      |                                                                                | Scheirer-Ray-Hare Test                   | Layer      | H(2)           | 3.008   | 0.2222              | Eta squared | <0.001                      |                                   |                     |
|                           |                                                                      | Dunn's multiple comparison: comparing time points within layer                 | Time Point                               | H(1)       | 22.249         | <0.0001 | Eta squared         | 0.575       |                             |                                   |                     |
|                           |                                                                      |                                                                                | Layer 1 Control vs. 8 h                  | U(n1=n2=6) | 4              | 0.0780  | r                   | 0.647       | Bonferroni adjusted p-value |                                   |                     |
|                           |                                                                      |                                                                                | Layers 2-4 Control vs. 8 h               | U(n1=n2=6) | 0              | 0.0066  | r                   | 0.832       | Bonferroni adjusted p-value |                                   |                     |
|                           |                                                                      |                                                                                | Layer 5 Control vs. 8 h                  | U(n1=n2=6) | 0              | 0.0066  | r                   | 0.832       | Bonferroni adjusted p-value |                                   |                     |
| Figure 4J                 | TUNEL interneuron counts                                             | Adjusted rank transform                                                        | Interaction (Layer X Time Point)         | F(2,30)    | 5.149          | 0.0120  | Partial eta squared | 0.256       |                             | No: residuals fail normality test |                     |
|                           |                                                                      |                                                                                | Scheirer-Ray-Hare Test                   | Layer      | H(2)           | 6.980   | 0.0305              | Eta squared | 0.066                       |                                   |                     |
|                           |                                                                      | Dunn's multiple comparison: comparing time points within layer                 | Time Point                               | H(1)       | 19.610         | <0.0001 | Eta squared         | 0.487       |                             |                                   |                     |
|                           |                                                                      |                                                                                | Layer 1 Control vs. 8 h                  | U(n1=n2=6) | 0              | 0.0066  | r                   | 0.832       | Bonferroni adjusted p-value |                                   |                     |
|                           |                                                                      |                                                                                | Layers 2-4 Control vs. 8 h               | U(n1=n2=6) | 0              | 0.0066  | r                   | 0.832       | Bonferroni adjusted p-value |                                   |                     |
|                           |                                                                      |                                                                                | Layer 5 Control vs. 8 h                  | U(n1=n2=6) | 0              | 0.0066  | r                   | 0.832       | Bonferroni adjusted p-value |                                   |                     |
| Figure 5I                 | PSVue cell counts                                                    | Adjusted rank transform                                                        | Interaction (Layer X Time Point)         | F(2,30)    | 44.306         | <0.0001 | Partial eta squared | 0.747       |                             | No: residuals fail normality test |                     |
|                           |                                                                      |                                                                                | Scheirer-Ray-Hare Test                   | Layer      | H(2)           | 17.935  | 0.0001              | Eta squared | 0.431                       |                                   |                     |
|                           |                                                                      | Dunn's multiple comparison: comparing time points within layer                 | Time Point                               | H(1)       | 13.616         | 0.0002  | Eta squared         | 0.287       |                             |                                   |                     |
|                           |                                                                      |                                                                                | Layer 1 Control vs. 8 h                  | U(n1=n2=6) | 0              | 0.0066  | r                   | 0.832       | Bonferroni adjusted p-value |                                   |                     |
|                           |                                                                      |                                                                                | Layers 2-4 Control vs. 8 h               | U(n1=n2=6) | 0              | 0.0066  | r                   | 0.832       | Bonferroni adjusted p-value |                                   |                     |
|                           |                                                                      |                                                                                | Layer 5 Control vs. 8 h                  | U(n1=n2=6) | 0              | 0.0066  | r                   | 0.832       | Bonferroni adjusted p-value |                                   |                     |
| Figure 5J                 | PSVue interneuron counts                                             | Adjusted rank transform                                                        | Interaction (Layer X Time Point)         | F(2,30)    | 19.027         | <0.0001 | Partial eta squared | 0.559       |                             | No: residuals fail normality test |                     |
|                           |                                                                      |                                                                                | Scheirer-Ray-Hare Test                   | Layer      | H(2)           | 20.406  | <0.0001             | Eta squared | 0.514                       |                                   |                     |
|                           |                                                                      | Dunn's multiple comparison: comparing time points within layer                 | Time Point                               | H(1)       | 10.296         | 0.0013  | Eta squared         | 0.177       |                             |                                   |                     |
|                           |                                                                      |                                                                                | Layer 1 Control vs. 8 h                  | U(n1=n2=6) | 0              | 0.0066  | r                   | 0.832       | Bonferroni adjusted p-value |                                   |                     |
|                           |                                                                      |                                                                                | Layers 2-4 Control vs. 8 h               | U(n1=n2=6) | 0              | 0.0066  | r                   | 0.832       | Bonferroni adjusted p-value |                                   |                     |
|                           |                                                                      |                                                                                | Layer 5 Control vs. 8 h                  | U(n1=n2=6) | 0              | 0.0066  | r                   | 0.832       | Bonferroni adjusted p-value |                                   |                     |



| Figure or results section                                   | Experiment                                                                 | Test                                                                                          | Measure                                                  | df              | Test statistic      | p value | Effect size measure                                                 | Effect size         | Notes                                                                                      | Passes SW normality test?         |
|-------------------------------------------------------------|----------------------------------------------------------------------------|-----------------------------------------------------------------------------------------------|----------------------------------------------------------|-----------------|---------------------|---------|---------------------------------------------------------------------|---------------------|--------------------------------------------------------------------------------------------|-----------------------------------|
| Figure 7D                                                   | Interneuron synaptic excitability                                          | One sample t-test or Wilcoxon signed-rank test (% change vs. 0 for both tests)                | % change after 90 mM ethanol                             | t(10)           | 5.189               | 0.0004  | Hedges' g                                                           | 1.294               | One sample t-test compared to 0                                                            | Yes                               |
|                                                             |                                                                            |                                                                                               | % change after 5uM AP5                                   | t(10)           | 4.868               | 0.0007  | Hedges' g                                                           | 1.214               | One sample t-test compared to 0                                                            | Yes                               |
|                                                             |                                                                            |                                                                                               | % change after 50 nM NBQX                                | n/a             | 0.652               | 0.5147  | r                                                                   | 0.206               | Wilcoxon signed-rank test compared to 0                                                    | No                                |
|                                                             |                                                                            |                                                                                               | % change after 5 uM AP5 + 50 nM NBQX                     | t(10)           | 7.456               | <0.0001 | Hedges' g                                                           | 1.859               | One sample t-test compared to 0                                                            | Yes                               |
|                                                             |                                                                            | Kruskal-Wallis test: % Change in excitability following drug application                      | Drug                                                     | $\chi^2(3)$     | 18.377              | <0.0001 | Partial eta squared                                                 | 0.320               | Is there a difference in how drugs affected AP#?                                           |                                   |
|                                                             |                                                                            |                                                                                               | 90 uM ethanol vs 5 uM AP5                                | n/a             | 0.331               | >0.9999 | r                                                                   | 0.071               | Bonferroni adjusted p-value                                                                |                                   |
|                                                             |                                                                            |                                                                                               | 90 uM ethanol vs 50 nM NBQX                              | n/a             | 2.886               | 0.0433  | r                                                                   | 0.586               | Bonferroni adjusted p-value                                                                | No: residuals fail normality test |
|                                                             |                                                                            |                                                                                               | 90 uM ethanol vs 5 uM AP5 + 50 nM NBQX                   | n/a             | 1.605               | 0.6507  | r                                                                   | 0.342               | Bonferroni adjusted p-value                                                                |                                   |
| Dunn's multiple comparison: Comparing how drugs changed AP# | 5 uM AP5 vs. 50 nM NBQX                                                    | n/a                                                                                           | 2.363                                                    | 0.1088          | r                   | 0.516   | Bonferroni adjusted p-value                                         |                     |                                                                                            |                                   |
|                                                             | 5 uM AP5 vs. 5 uM AP5 + 50 nM NBQX                                         | n/a                                                                                           | 1.936                                                    | 0.3169          | r                   | 0.413   | Bonferroni adjusted p-value                                         |                     |                                                                                            |                                   |
|                                                             | 50 nM NBQX vs. 5 uM AP5 + 50 nM NBQX                                       | n/a                                                                                           | 4.253                                                    | 0.0001          | r                   | 0.928   | Bonferroni adjusted p-value                                         |                     |                                                                                            |                                   |
|                                                             | Interaction: Acute ethanol X cell type                                     | F(1,20)                                                                                       | 14.860                                                   | 0.0010          | Partial eta squared | 0.426   | Did 90 mM inhibit action potentials differently between cell types? | Yes: residuals pass |                                                                                            |                                   |
| Figure 7 C-D                                                | Effect of ethanol on action potential number                               | Repeated measures two-way ANOVA                                                               | Main effect: Acute ethanol                               | F(1,20)         | 124.647             | <0.0001 | Partial eta squared                                                 | 0.452               |                                                                                            |                                   |
|                                                             |                                                                            |                                                                                               | Main effect: Cell type                                   | F(1,20)         | 14.860              | 0.0010  | Partial eta squared                                                 | 0.426               |                                                                                            |                                   |
|                                                             |                                                                            |                                                                                               | Interaction (exposure X acute effect)                    | F(2,28)         | 0.781               | 0.4678  | Partial eta squared                                                 | 0.053               |                                                                                            |                                   |
| Supplemental figure 2C                                      | AMPA PPR                                                                   | Repeated measures two-way ANOVA: Effect of 90 mM ethanol application X vapor chamber exposure | Main effect: exposure                                    | F(1,14)         | 1.663               | 0.2077  | Partial eta squared                                                 | 0.114               |                                                                                            | Yes: residuals pass               |
|                                                             |                                                                            |                                                                                               | Main effect: acute effect                                | F(2,28)         | 0.202               | 0.1136  | Partial eta squared                                                 | 0.106               |                                                                                            |                                   |
|                                                             |                                                                            |                                                                                               | Interaction (exposure X acute effect)                    | F(2,22)         | 0.904               | 0.4194  | Partial eta squared                                                 | 0.076               |                                                                                            |                                   |
| Supplemental figure 2D                                      | AMPA PPR                                                                   | Repeated measures two-way ANOVA: Effect of 90 mM ethanol application X vapor chamber exposure | Main effect: exposure                                    | F(1,11)         | 0.714               | 0.4162  | Partial eta squared                                                 | 0.061               |                                                                                            | Yes: residuals pass               |
|                                                             |                                                                            |                                                                                               | Main effect: acute effect                                | F(2,22)         | 3.757               | 0.0395  | Partial eta squared                                                 | 0.255               |                                                                                            |                                   |
|                                                             |                                                                            |                                                                                               | Interaction (phase X vapor chamber exposure X cell type) | F(2,50)         | 1.524               | 0.2278  | Partial eta squared                                                 | 0.057               |                                                                                            |                                   |
| Supplemental Figure 2E                                      | Effect of ethanol on AMPA PPR                                              | Repeated measures three-way ANOVA                                                             | Interaction (phase X vapor chamber exposure)             | F(2,50)         | 0.173               | 0.8414  | Partial eta squared                                                 | 0.007               | Three way ANOVA: Phase(Baseline, Acute ethanol, Wash) X Vapor chamber exposure X cell type | Yes: residuals pass               |
|                                                             |                                                                            |                                                                                               | Interaction (phase X cell type)                          | F(2,50)         | 0.379               | 0.6864  | Partial eta squared                                                 | 0.015               |                                                                                            |                                   |
|                                                             |                                                                            |                                                                                               | Main effect: phase                                       | F(2,50)         | 5.256               | 0.0085  | Partial eta squared                                                 | 0.174               |                                                                                            |                                   |
|                                                             |                                                                            |                                                                                               | Main effect: vapor chamber exposure                      | F(1,25)         | 2.041               | 0.1655  | Partial eta squared                                                 | 0.075               |                                                                                            |                                   |
|                                                             |                                                                            | Multiple comparison                                                                           | Main effect: cell type                                   | F(1,25)         | 0.002               | 0.968   | Partial eta squared                                                 | <0.001              |                                                                                            |                                   |
|                                                             |                                                                            |                                                                                               | Baseline vs. ethanol                                     | t(50)           | 1.560               | 0.3754  | Hedges' g                                                           | 0.230               | Bonferroni adjusted p-value                                                                |                                   |
|                                                             |                                                                            |                                                                                               | Baseline vs. Wash                                        | t(50)           | 1.682               | 0.2965  | Hedges' g                                                           | 0.214               | Bonferroni adjusted p-value                                                                |                                   |
|                                                             |                                                                            |                                                                                               | ethanol vs. Wash                                         | t(50)           | 3.242               | 0.0064  | Hedges' g                                                           | 0.482               | Bonferroni adjusted p-value                                                                |                                   |
| Supplemental Figure 3                                       | Effect of ethanol exposure on mini EPSC characteristics: pyramidal neurons | Unpaired t-test                                                                               | mini EPSC amplitude                                      | t(8,545)        | 1.935               | 0.0867  | Hedges' g                                                           | 0.865               | Welch's correction for unequal variances                                                   | Yes                               |
|                                                             |                                                                            |                                                                                               | mini EPSC frequency                                      | t(7,454)        | 1.207               | 0.264   | Hedges' g                                                           | 0.601               | Welch's correction for unequal variances                                                   | Yes                               |
|                                                             |                                                                            |                                                                                               | mini EPSC decay tau                                      | U(n1=7,n2=9)    | 9                   | 0.0164  | r                                                                   | 0.596               | Ethanol-exposed fails normality test                                                       |                                   |
|                                                             | Effect of ethanol exposure on mini EPSC characteristics: interneurons      | Unpaired t-test                                                                               | mini EPSC amplitude                                      | t(13)           | 1.293               | 0.2185  | Hedges' g                                                           | 0.627               |                                                                                            | Yes                               |
|                                                             |                                                                            |                                                                                               | mini EPSC frequency                                      | U(n1=7,n2=8)    | 27                  | 0.9551  | r                                                                   | 0.030               | Ethanol-exposed fails normality test                                                       |                                   |
|                                                             |                                                                            |                                                                                               | mini EPSC decay tau                                      | U(n1=7,n2=8)    | 27                  | 0.9551  | r                                                                   | 0.030               | Non-exposed fails normality test                                                           |                                   |
| Supplemental Figure 4C                                      | Effect of ethanol on Intrinsic excitability: Pyramidal neurons             | Repeated measures two-way ANOVA                                                               | Interaction (phase X current injected)                   | F(1,629,13,030) | 2.316               | 0.1437  | Partial eta squared                                                 | 0.224               | Greenhouse-Geisser corrected p-value and F-ratio                                           | Yes: residuals pass               |
|                                                             |                                                                            |                                                                                               | Main effect of phase (baseline, ethanol, wash)           | F(1,237,9,895)  | 3.760               | 0.0757  | Partial eta squared                                                 | 0.320               |                                                                                            |                                   |
|                                                             |                                                                            |                                                                                               | Main effect of current injected (200,400,600 pA)         | F(1,078,8,622)  | 135.4               | <0.0001 | Partial eta squared                                                 | 0.944               |                                                                                            |                                   |
| Supplemental Figure 4D                                      | Effect of ethanol on Intrinsic excitability: Interneurons                  | Repeated measures two-way ANOVA                                                               | Interaction (phase X current injected)                   | F(1,423,8,539)  | 0.761               | 0.4530  | Partial eta squared                                                 | 0.113               | Greenhouse-Geisser corrected p-value and F-ratio                                           | Yes: residuals pass               |
|                                                             |                                                                            |                                                                                               | Main effect of phase (baseline, ethanol, wash)           | F(1,889,11,340) | 3.395               | 0.0534  | Partial eta squared                                                 | 0.394               |                                                                                            |                                   |
|                                                             |                                                                            |                                                                                               | Main effect of current injected (200,400,600 pA)         | F(1,064,6,386)  | 340.6               | <0.0001 | Partial eta squared                                                 | 0.983               |                                                                                            |                                   |
| Supplemental Figure 5A                                      | Mimicking 90 mM ethanol inhibition of NMDA currents with 5 uM AP5          | Unpaired t-test                                                                               | % inhibition: 90 mM ethanol vs. 5 uM AP5                 | t(14)           | 1.209               | 0.2468  | Hedges' g                                                           | 0.593               |                                                                                            | Yes                               |
| Supplemental Figure 5B                                      | Mimicking 90 mM ethanol inhibition of non-NMDA currents with 50 nM NBQX    | Unpaired t-test                                                                               | % inhibition: 90 mM ethanol vs. 50 nM NBQX               | t(11)           | 0.667               | 0.5183  | Hedges' g                                                           | 0.389               |                                                                                            | Yes                               |

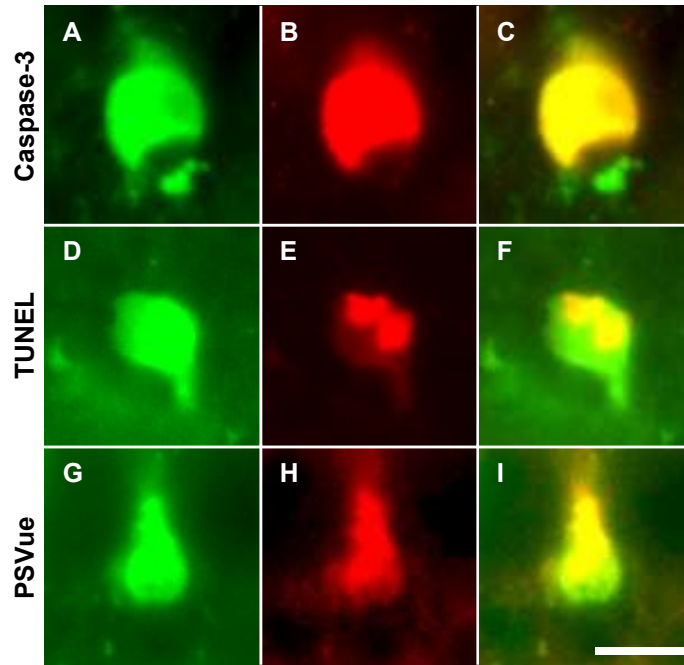

**Supplemental Figure 1. High magnification images showing colocalization of apoptotic markers with Venus-positive interneurons.** (40X objective, scale bar = 10  $\mu$ m) Co-localization of Venus fluorescence (panels A, D, and G) with cleaved caspase-3 (B), TUNEL (E) and PSVue (H) immunofluorescence. The corresponding merged images are shown in panels C, F, and I.

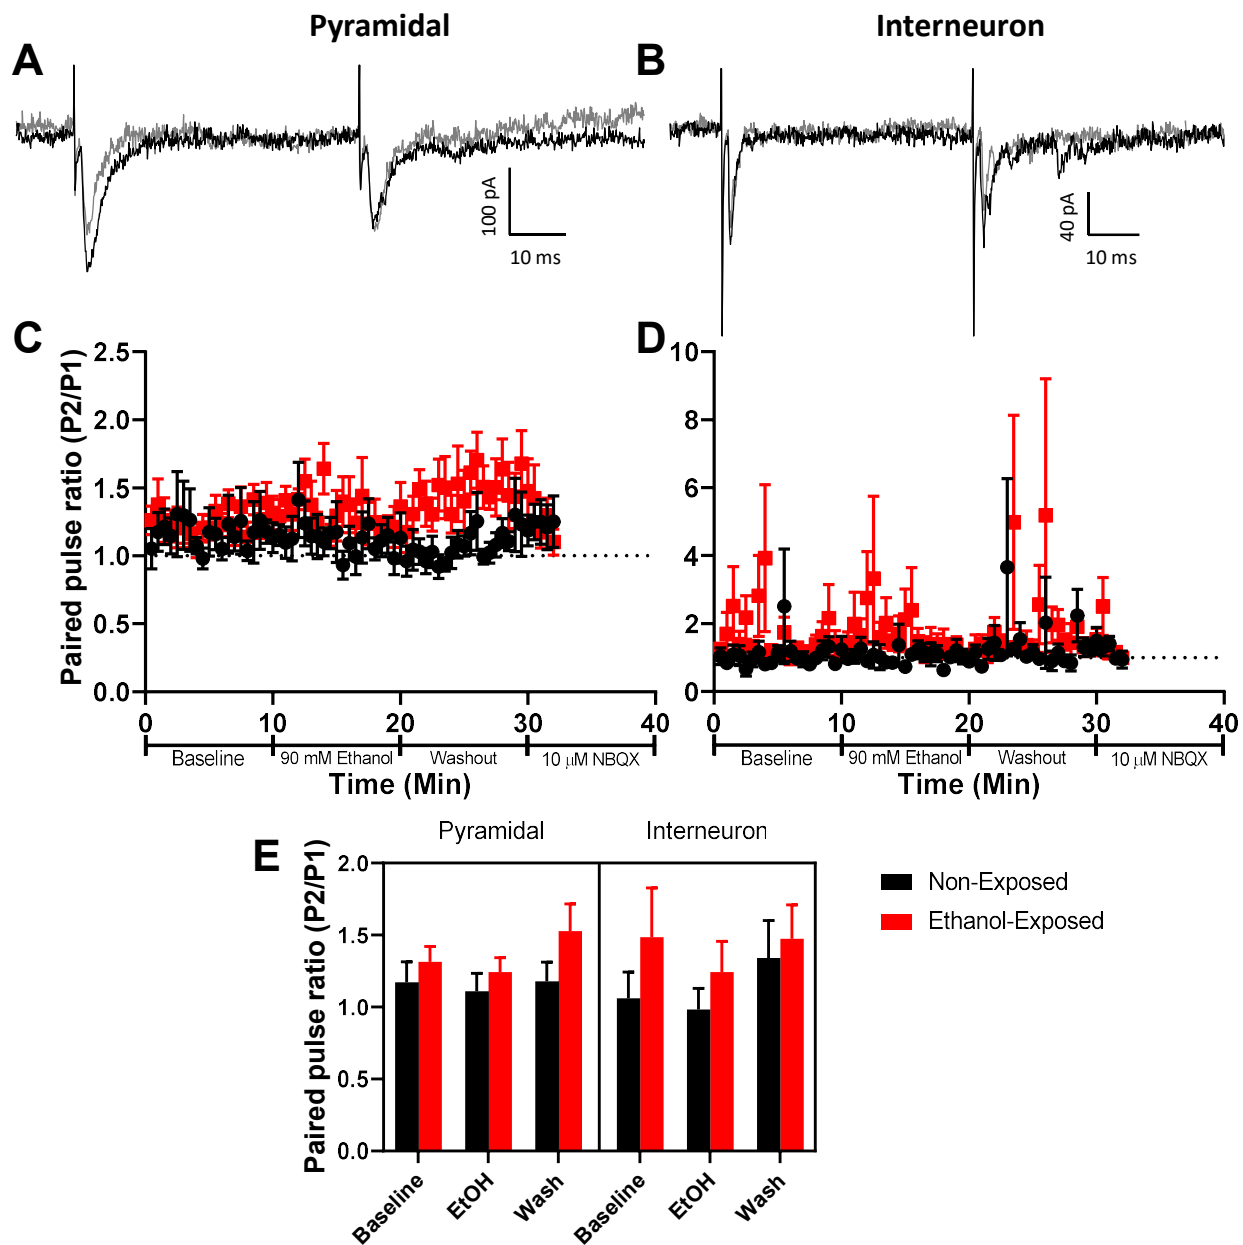

**Supplemental Figure 2. Non-NMDA EPSC paired pulse ratios in pyramidal neurons and interneurons from control and ethanol exposed animals.**

Representative evoked AMPA paired pulse traces are shown for (A) pyramidal neurons and (B) interneurons during baseline (black traces) and acute 90 mM ethanol bath application (grey traces) in animals not exposed to vaporized ethanol *in vivo*. Effect of 90 mM ethanol on paired pulse ratios in (C) pyramidal neurons and (D) interneurons from control animals (black data points) and 4-h ethanol vapor-exposed animals (red data points). E) Average paired pulse ratios from the last 3 min of each phase (baseline, 90 mM ethanol application, and washout) are shown for both pyramidal neurons and interneurons from non-exposed and 4-h ethanol vapor-exposed animals. Pyramidal neuron non-exposed and ethanol-exposed n = 8 animals (1 cell per animal, each from a different litter); interneuron non-exposed n = 6 animals (7 cells from 6 litters), ethanol-exposed n = 7 animals (1 cell per animal, each from a different litter). Data shown are mean  $\pm$  SEM.

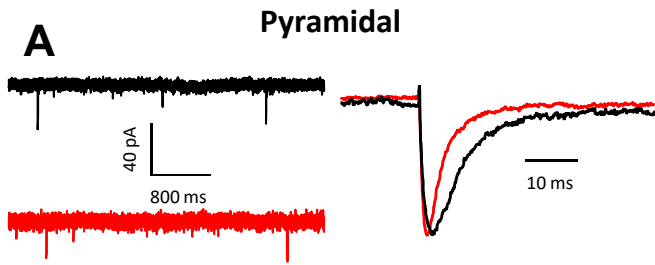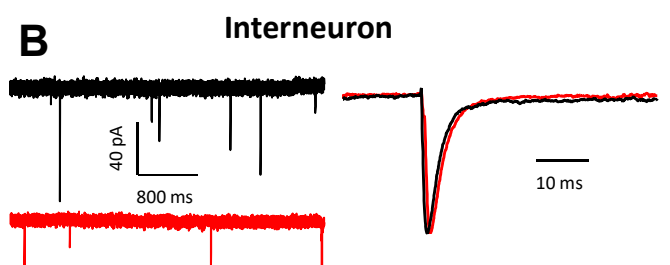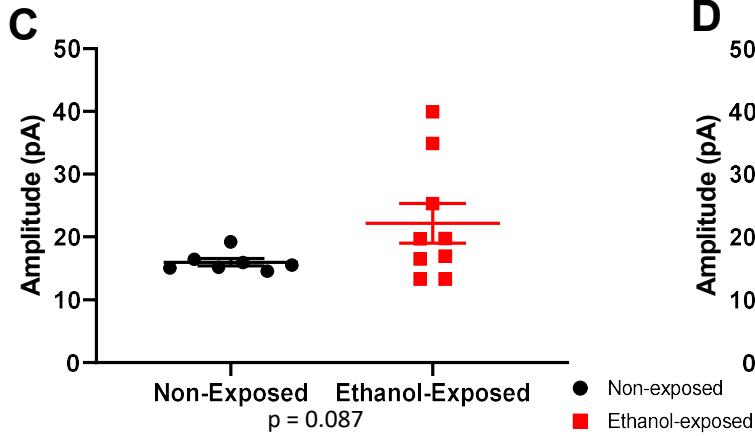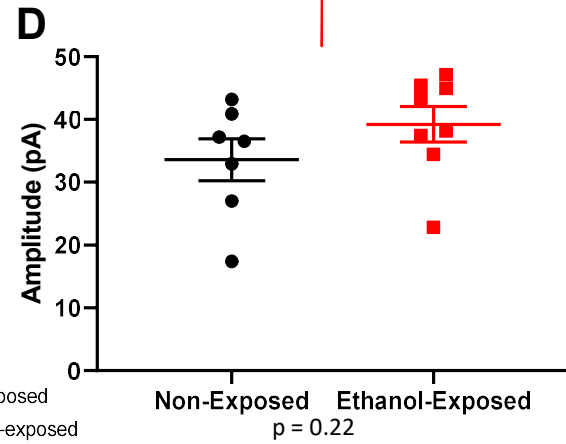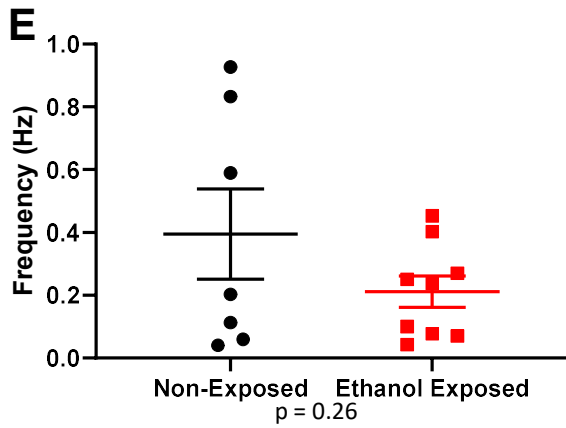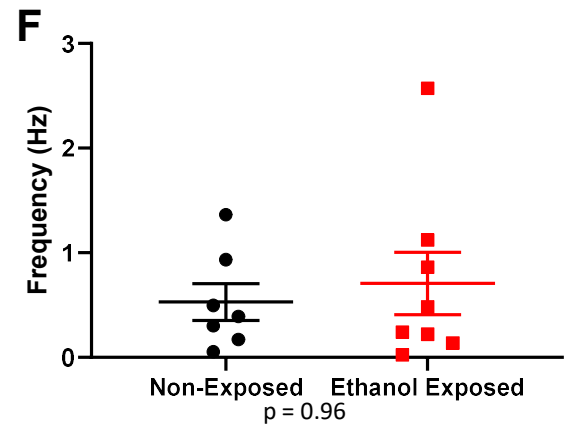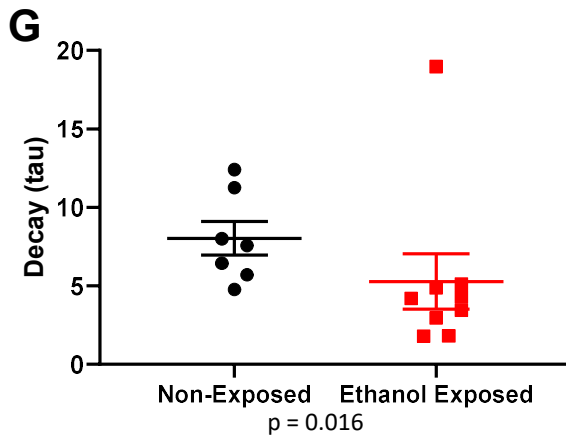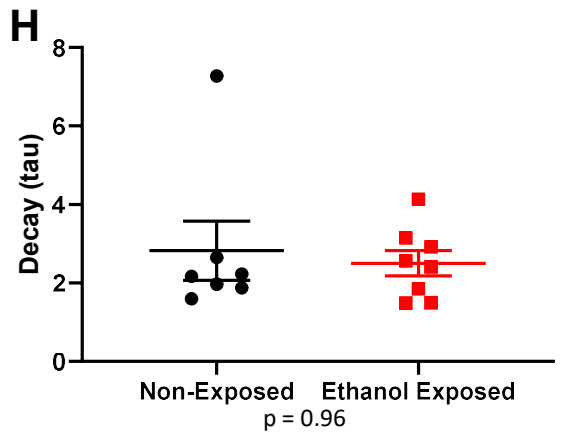

**Supplemental Figure 3. mEPSC amplitude, frequency, and decay time constants in pyramidal neurons and interneurons from control and ethanol exposed animals.** Representative mEPSC traces and average mEPSC waveforms (amplitudes normalized) from (A) pyramidal neurons and (B) interneurons from control (black traces) and ethanol exposed (red traces) animals. The average amplitude of mEPSCs in C) pyramidal neurons and D) interneurons is shown. E-F) The average frequency of mEPSCs in E) pyramidal neurons and F) interneurons is shown. The average decay constant (tau from a single-exponential curve fit) is shown for (G) pyramidal neurons and (H) interneurons. p-values shown are from appropriate parametric or non-parametric tests. For a detailed presentation of statistical tests performed please see Supplemental Table 1. Pyramidal non-exposed n = 7 animals (1 cell per animal, each from a different litter), ethanol-exposed n = 9 animals (1 cell per animal, each from a different litter); interneuron non-exposed n = 7 animals (1 cell per animal, each from a different litter), ethanol-exposed n = 8 animals (1 cell per animal, each from a different litter). Data shown are individual values from each cell along with the mean  $\pm$  SEM.



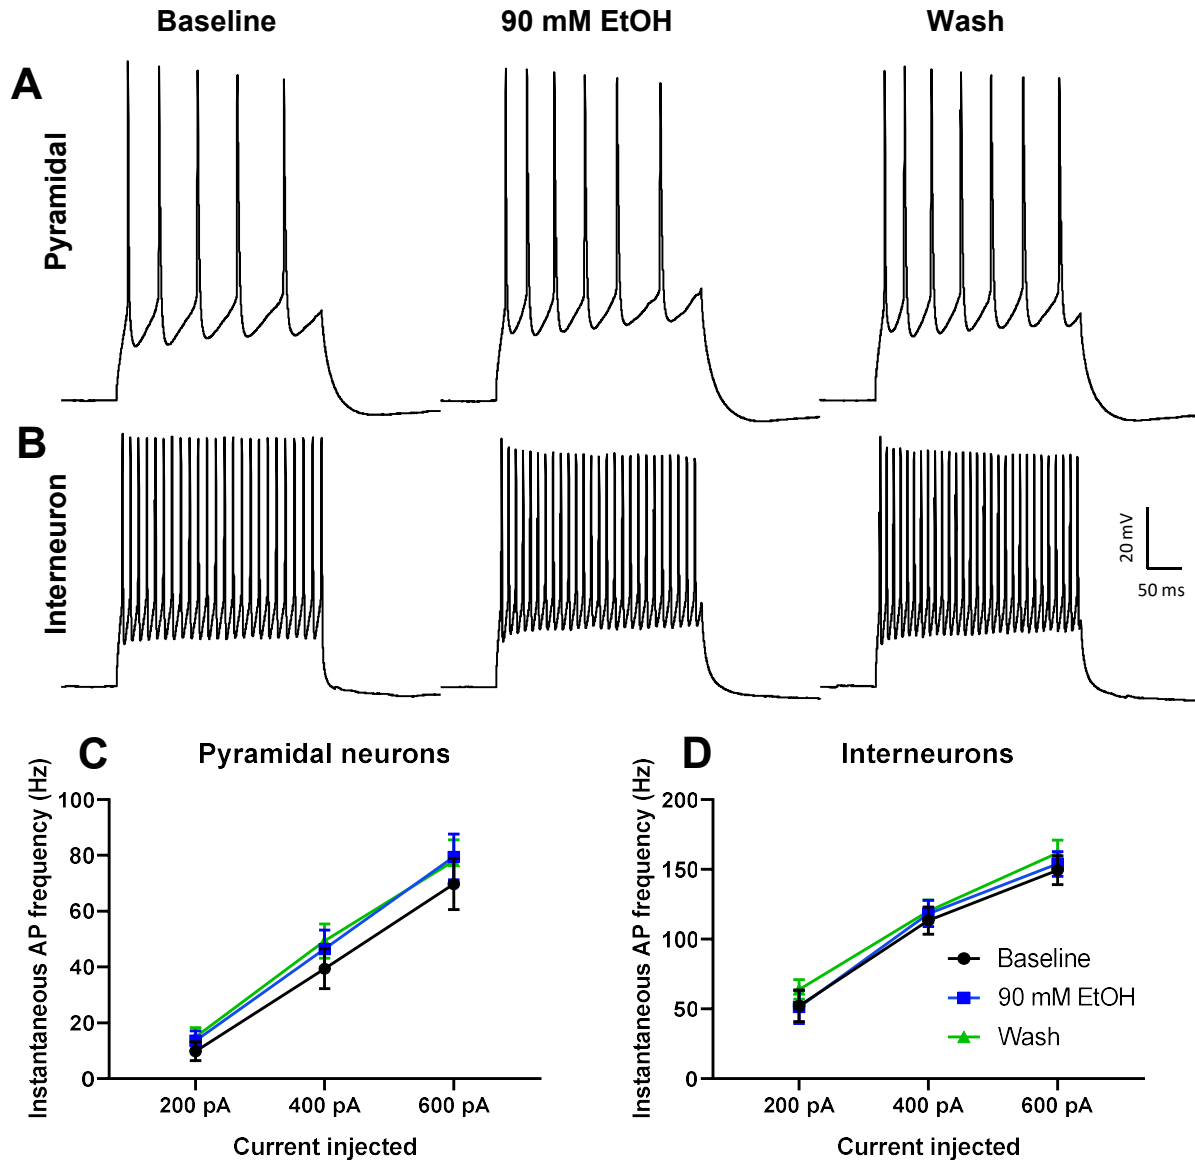

**Supplemental Figure 4. Acute effect of 90 mM ethanol on action potential firing induced by current injection in pyramidal neurons and interneurons.**

Shown are representative voltage traces recorded from (A) pyramidal neurons and (B) interneurons during a 400 pA, 300 ms current injection during baseline, acute application of 90 mM ethanol, and washout (all from animals not exposed to ethanol vapor). Also shown are plots illustrating that acute bath application of ethanol had little effect on the instantaneous action potential firing frequency in pyramidal neurons (C) and interneurons (D). For a detailed presentation of statistical tests performed please see Supplemental Table 1. Pyramidal neuron  $n = 9$  cells (from 5 animals from 2 litters); interneuron  $n = 7$  cells (from 5 animals from 2 litters). Data presented are mean  $\pm$  SEM.

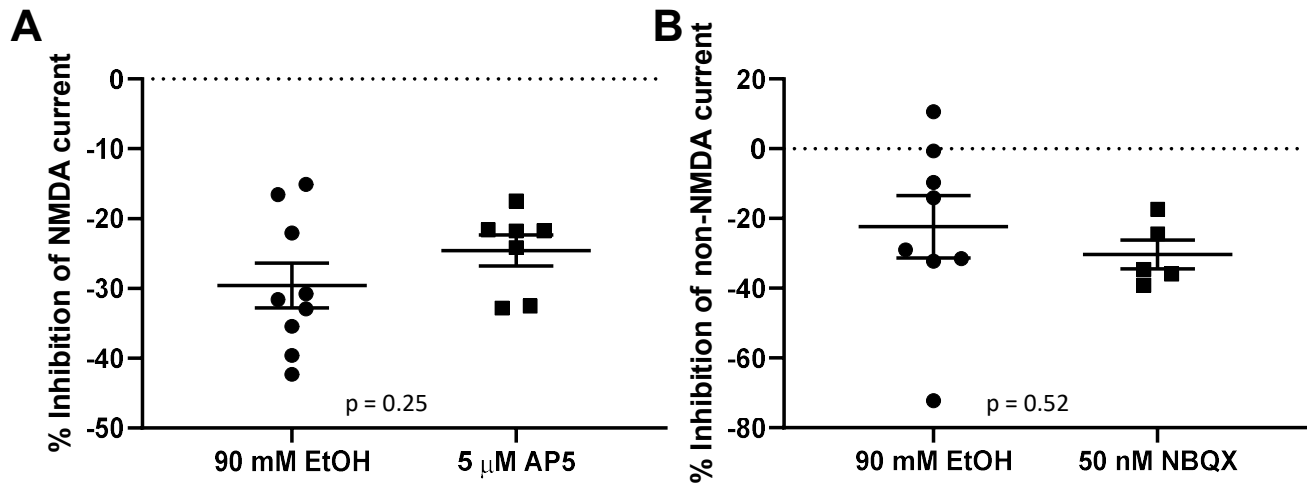

**Supplemental Figure 5. Mimicking the effects of acute bath application of 90 mM ethanol on NMDA and non-NMDA evoked EPSC amplitude with 5 μM DL-AP5 and 50 nM NBQX in pyramidal neurons, respectively.** A) The percent inhibition on NMDA EPSC amplitude caused by 90 mM ethanol application (calculated from the data shown in Fig 6) and 5 μM DL-AP5 are compared. B) The percent inhibition on non-NMDA current amplitude caused by 90 mM ethanol application (calculated from the data shown in Fig 6) and 50 nM NBQX are compared. p-values presented are from unpaired t-tests. NMDA current 90 mM EtOH n = 9 cells (1 cell per animal, each from a different litter), 5 μM DL-AP5 n = 7 cells (1 cell per animal, each from a different litter). Non-NMDA current 90 mM EtOH n = 8 cells (1 cell per animal, each from a different litter), 50 nM NBQX n = 5 (1 cell per animal, each from a different litter). Data presented are individual values along with the mean ± SEM.
